# Supplementary material
Source: PubMed Central journal article supplement (PMC3362240)

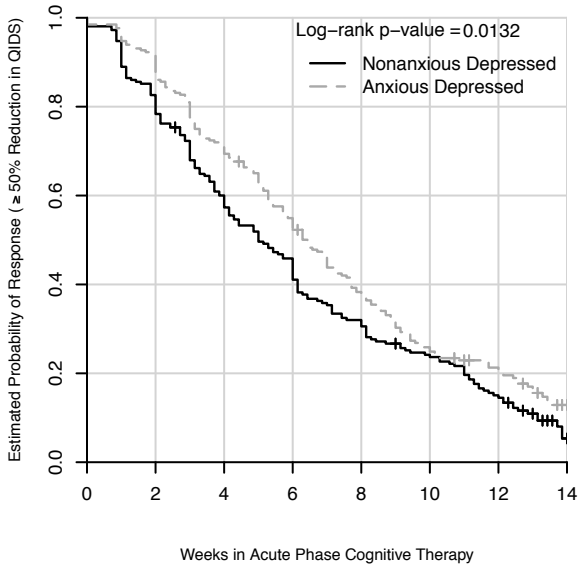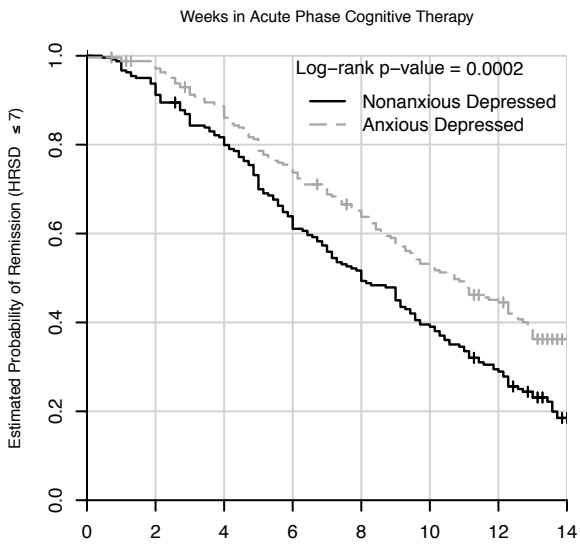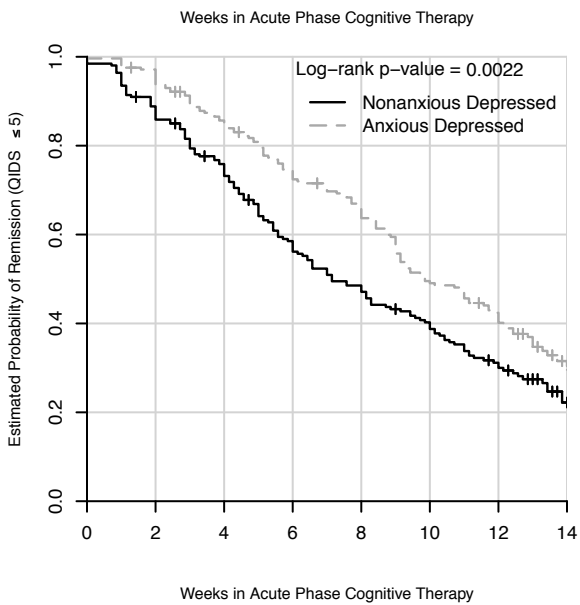

Supplement: pps-0081-0153-s01.pdf [file pps-0081-0153-s01.pdf]

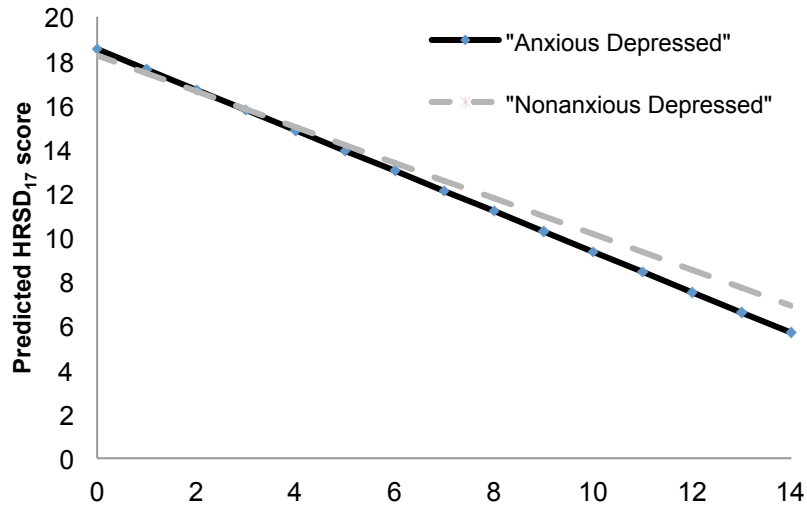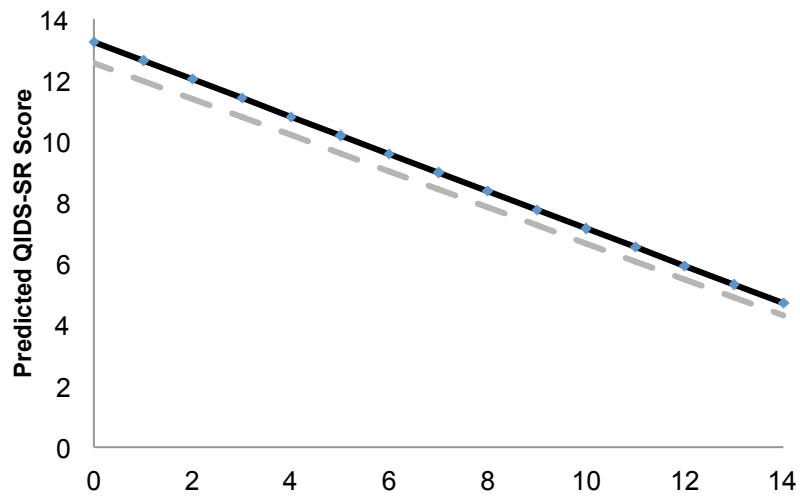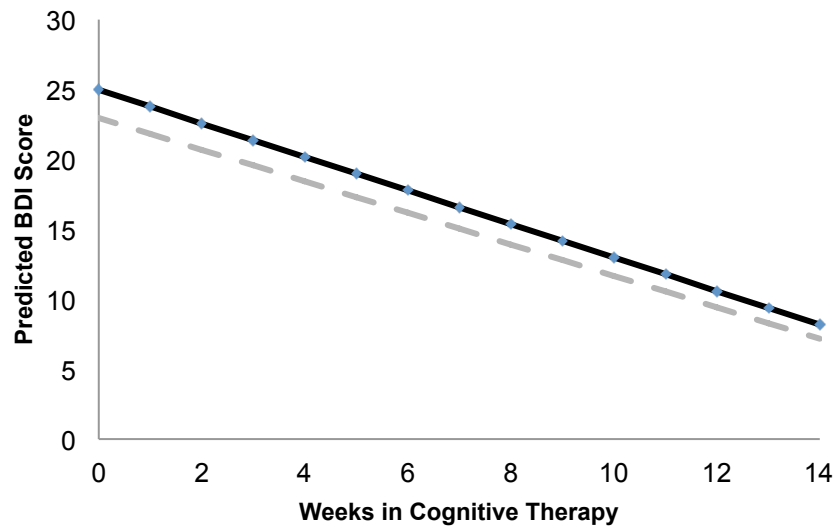

Supplement: pps-0081-0153-s02.pdf [file pps-0081-0153-s02.pdf]

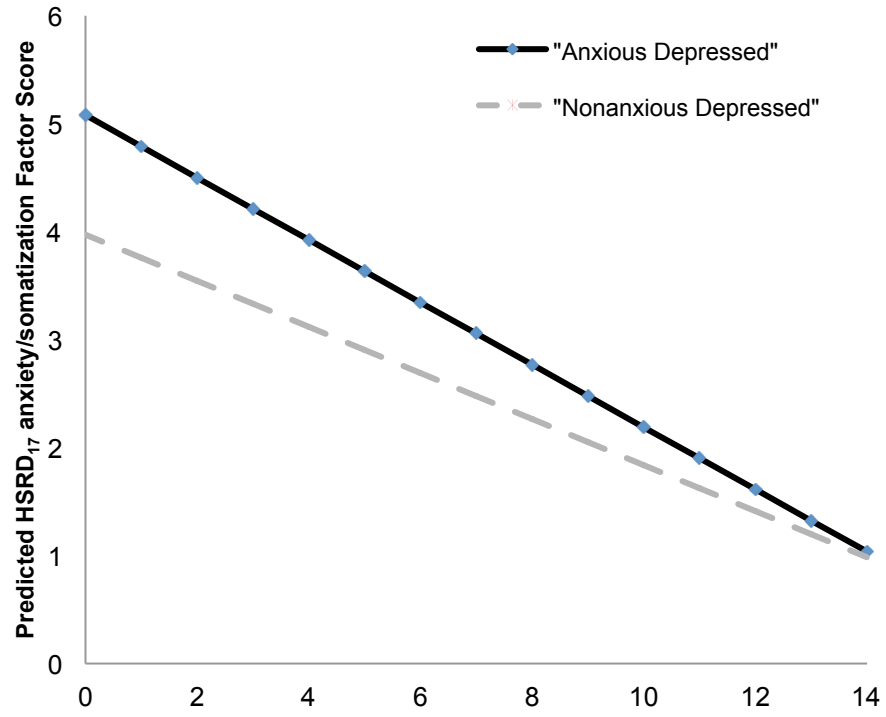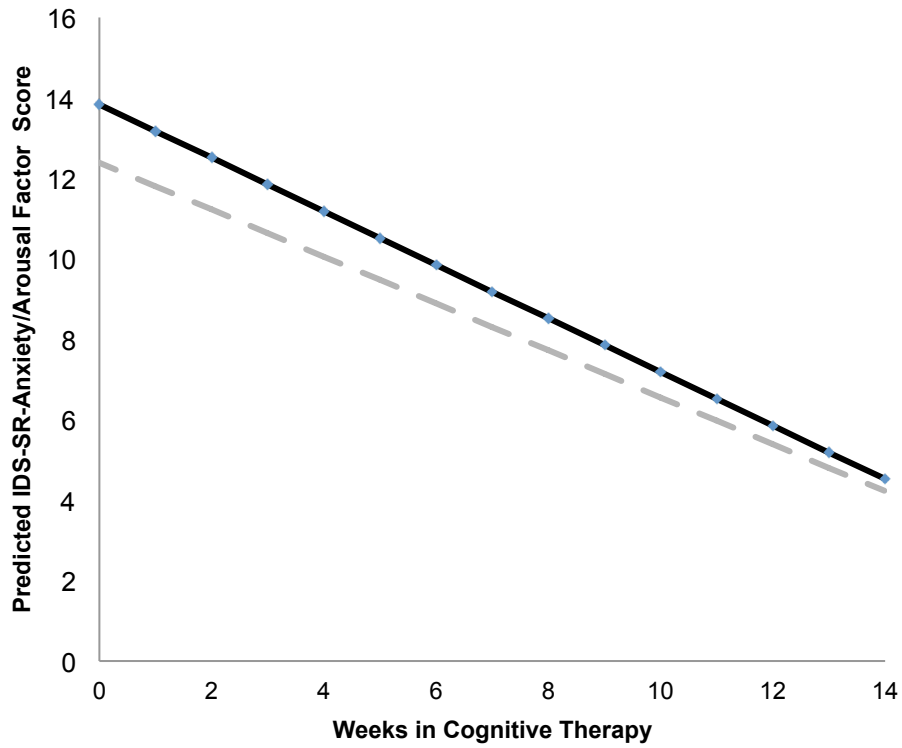

Supplement: pps-0081-0153-s03.pdf [file pps-0081-0153-s03.pdf]
